1 **Title: Genetic and species-level biodiversity patterns are linked by**  
2 **demography and ecological opportunity**

3 **Running title:** Geography of nuclear genetic diversity

4 **Authors:** Chloé Schmidt<sup>1\*</sup>, Stéphane Dray<sup>2</sup>, Colin J. Garroway<sup>1\*</sup>

5 **Affiliations:**

6 <sup>1</sup>Department of Biological Sciences, 50 Sifton Rd, University of Manitoba, Winnipeg, Manitoba  
7 R3T 2N2 Canada

8 <sup>2</sup>Univ Lyon, Université Claude Bernard Lyon 1, CNRS, Laboratoire de Biométrie et Biologie  
9 Evolutive, F-69100, Villeurbanne, France

10 \*Correspondence to:

11 Chloé Schmidt  
12 Department of Biological Sciences  
13 50 Sifton Rd  
14 University of Manitoba  
15 Winnipeg, MB R3T 2N2  
16 email: schmid46@myumanitoba.ca

17  
18 Colin J Garroway  
19 Department of Biological Sciences  
20 50 Sifton Rd  
21 University of Manitoba  
22 Winnipeg, MB R3T 2N2  
23 email: colin.garroway@umanitoba.ca

24  
25

26 **Abstract:** Species richness and genetic diversity are the two most fundamental products of  
27 evolution. Both are important conservation targets—species richness contributes to ecosystem  
28 functioning and human wellbeing, while genetic diversity allows those species to respond to  
29 changes in their environment and persist in the long-term. Biogeographic patterns of species  
30 richness are well-described, but we know little about patterns of genome-wide genetic diversity  
31 at similar spatial scales. Further, despite considerable attention to latitudinal trends in species  
32 richness, we still do not have a solid empirical understanding of the various processes that  
33 produce them, how they interact, or how they affect genetic diversity. Here we show that  
34 genome-wide genetic diversity and species richness share spatial structure, however, species  
35 richness hotspots tend to harbor low levels of within-species genetic variation. A single model  
36 encompassing eco-evolutionary processes related to environmental energy availability, niche  
37 availability, and proximity to humans explained 75% of variation in gene diversity and 90% of  
38 the variation in species richness. Our empirical model of both levels of biodiversity supports  
39 theory and demonstrates the importance of carrying capacity and ecological opportunity at  
40 individual and species levels for generating continent-wide genetic and species diversity  
41 gradients.

42

43 **Keywords:** more individuals hypothesis, heterogeneity, Anthropocene, latitudinal diversity  
44 gradient, carrying capacity, macroecology

45 **Introduction**

46 Biodiversity patterns at the genetic and species levels form the foundation upon which higher-  
47 level diversity patterns emerge with the processes that generate diversity across these two base  
48 levels likely so entangled that they should be considered inseparable (Lowe et al. 2017; Pontarp  
49 et al. 2019). Biogeographic-scale variations in species-level diversity are among the best-  
50 described patterns in nature (Pontarp et al. 2019). The exploration of biogeographic patterns in  
51 genetic diversity across species has had to wait for technological advances in molecular genetics  
52 and the accumulation of data (Miraldo et al. 2016; Manel et al. 2020; Theodoridis et al. 2020).  
53 Regardless of research effort, our empirical understanding of the causes of diversity patterns at  
54 remains underdeveloped (Pontarp et al. 2019), likely in part due to a lack of integrated analyses  
55 of the causes of diversity at both levels. Here we produce a continent-scale map of nuclear  
56 genetic diversity for North American mammals and show that genetic diversity and species-level  
57 diversity are spatially correlated and likely have common environmental causes.

58

59 Existing hypotheses for species diversity patterns (Lomolino et al. 2016) generally fall into three  
60 broad categories: those related to evolutionary time for diversification, different diversification  
61 rates, and ecological limits on the number of species a region can support. Evolutionary time  
62 hypotheses predict that regions that have been colonized for the longest times should tend to  
63 have higher species richness than elsewhere due to diversification having taken place for longer  
64 periods (e.g., greater time for speciation in the tropics). Diversification rate hypotheses suggest  
65 that spatial variation in speciation or extinction rates (e.g., due variation in environmental  
66 conditions, mutation rates, and generation times) explain species richness patterns. Finally,  
67 ecological limits hypotheses posit that variation in resource availability sets a species-level

68 carrying capacity that limits the number of species able to coexist in a particular area. Here  
69 speciation, extinction, and colonization dynamics of species are analogous to the birth, death,  
70 and immigration dynamics that set population-level carrying capacities. There are at least 26  
71 specific hypotheses that fall under these umbrella categories – detailed reviews can be found in  
72 (Mittelbach et al. 2007; Stein et al. 2014; Worm and Tittensor 2018; Pontarp et al. 2019).  
73  
74 Evolutionary time, evolutionary rates, and ecological limits hypotheses are often implicitly  
75 treated as competing ideas but speciation can clearly simultaneously be a product of both  
76 ecological and evolutionary processes (Pontarp and Wiens 2017). Indeed, recent modelling  
77 exercises suggest all categories of hypothesis can produce species richness gradients (Etienne et  
78 al. 2019). That said, the preponderance of theory suggests that carrying capacities limiting the  
79 supportable number of species in an environment produces the strongest and most stable species  
80 richness gradients (Vellend 2005; Worm and Tittensor 2018; Brodie 2019; Etienne et al. 2019).  
81 Etienne et al. (2019) used simulations to compare diversification rate, evolutionary time, and  
82 ecological limits hypotheses. Their models suggested that ecological limits on carrying capacity  
83 present the most parsimonious explanation for the latitudinal diversity gradient. There is also  
84 considerable empirical evidence in support of this theoretical work suggesting the likely  
85 importance of ecological limits in the formation of species richness patterns (Brodie 2019;  
86 Storch and Okie 2019). Taken together, there is good reason to consider ecological limits as a  
87 null expectation when exploring the causes of species richness patterns (Etienne et al. 2019).  
88  
89 We extended the consequences of processes related to ecological limits to explain multispecies  
90 population-level patterns of genetic diversity. If environments limit the number of species they

91 can support, they must also limit the population sizes of those species and thus the strength of  
92 genetic drift. Thus, demographic processes acting at the individual and species levels could  
93 simultaneously shape genetic and species-level biodiversity (Fig. 1). We focused on two  
94 prominent ecological limits hypotheses for species richness—the more individuals and  
95 environmental heterogeneity hypotheses. The more individuals hypothesis posits that energy  
96 availability imposes an upper limit on the number of individuals, and as a consequence, the  
97 number of species an area can support (Storch et al. 2018). According to the neutral theory of  
98 molecular evolution (Kimura 1983) and the neutral theory of biodiversity and biogeography  
99 (Hubbell 2001), diversity tends to increase with the number of individuals in an assemblage both  
100 in terms of genetic diversity within populations and the number of species in a community. We  
101 thus predicted positive relationships among genetic diversity, species richness, and energy  
102 availability. The habitat heterogeneity hypothesis suggests that environmental heterogeneity  
103 equates to niche availability, with heterogeneous areas able to support more specialized species,  
104 albeit at smaller population sizes because resources are divided (Kadmon and Allouche 2007;  
105 Allouche et al. 2012; Stein et al. 2014). As increasingly specialized populations diverge, genetic  
106 variation would be partitioned among locally adapted populations that may eventually no longer  
107 interbreed. These smaller populations will also lose genetic diversity due to genetic drift faster  
108 than large populations. We thus predicted that habitat heterogeneity would be positively  
109 associated with species richness and negatively associated with genetic diversity.

110

111 In addition to carrying capacity limits set by climatic factors and habitat complexity, a major  
112 contemporary environmental limitation on diversity is land transformation by humans. Habitat  
113 loss, fragmentation, and homogenization due to human activities such as urbanization reduce the

114 amount of habitat available to wild populations (McKinney 2006; Grimm et al. 2008) with  
115 consequences at genetic and species levels. Estimates suggest that within the last century, over  
116 400 vertebrate species have gone extinct (Ceballos et al. 2020), vertebrate population sizes  
117 worldwide have shrunk by an average of 60% (WWF 2018), and intraspecific genetic diversity  
118 across taxa has declined by approximately 6% (Leigh et al. 2019). Contemporary rapid  
119 environmental change contributes to biodiversity patterns in addition to long-term processes.  
120 Because humans are known to influence both levels of biodiversity, our effects should be  
121 examined alongside natural factors. By reducing habitable area and environmental heterogeneity,  
122 we predicted that the effects of urbanization should also cause species richness and genetic  
123 diversity to decrease in more heavily disturbed areas.

124  
125 Our objectives in this study were twofold. Biogeographic-scale correlations between nuclear  
126 genetic and species-level diversity patterns have not yet been established, so we first tested for  
127 shared spatial patterns at both levels of biodiversity. Having established shared patterns of  
128 variation we then tested for common environmental causes of genetic and species-level diversity  
129 using structural equation modelling (SEM). Structural equation modelling fits hypothesis  
130 networks that can accommodate multiple predictor and response variables within a hierarchical  
131 modelling framework. This allows the relative importance of multiple hypotheses to be assessed  
132 while accounting for species-level variation. Our data were repurposed publicly archived raw  
133 neutral nuclear genetic data for North American mammals spanning 801 sample sites, 38 species,  
134 and 34,841 individuals.

135

136 **Methods**

137 **Data assembly**

138 *Genetic diversity database.* We used the database of genetic metrics in North America compiled  
139 by Schmidt et al. (2020a,b). This database repurposed raw microsatellite data from 34,841  
140 individuals across 38 mammalian species sampled at 801 sites in the United States and Canada,  
141 and includes consistently calculated measures of gene diversity (Nei 1973) and population-  
142 specific  $F_{ST}$  (Weir and Goudet 2017). See Table S2 for a summary of the dataset. Microsatellite  
143 markers estimate genome-wide diversity well (Mittell et al. 2015). They are commonly used in  
144 wildlife population genetic studies because they are cost-effective and do not require a reference  
145 genome, which allowed us to maximize sample size. We chose to focus on North America to  
146 control for regional history. Detailed methods for assembling this dataset can be found in  
147 (Schmidt et al. 2020a). Briefly, we performed a systematic search for species names of native  
148 North American mammals with keywords “microsat\*”, “single tandem\*”, “short tandem\*”, and  
149 “str” using the ‘dataone’ R package, which interfaces with the DataONE platform to search  
150 online open data repositories (Jones et al. 2017). We discarded search results that did not meet  
151 our criteria for inclusion and removed results where study design may have influenced genetic  
152 diversity. For example we excluded non-neutral data and samples taken after a recent  
153 bottleneck, translocations, managed or captive populations, or island populations. We  
154 additionally removed populations with fewer than 5 individuals sampled. Gene diversity  
155 estimates the richness and evenness of alleles in a population, and we used it here as our metric  
156 for genetic diversity because it is minimally affected by sample size (Charlesworth and  
157 Charlesworth 2010)(Fig. S1). Sample sites are treated as point locations.

158 *Population size.* Because species-level censuses are not generally available, we used body size as  
159 a proxy for species-level population size. The inverse relationship between body size and species

160 population size is well documented and is especially reliable in mammals (Damuth 1981, 1987).  
161 Neutral genome-wide genetic diversity is also negatively correlated with body size (Frankham  
162 1996; Romiguier et al. 2014), the most likely explanation being strong links between body size  
163 and effective population size (Frankham 1996). We recorded mean adult body mass (g) for each  
164 species using data from the PanTHERIA database (Jones et al. 2009). Mass was log-transformed  
165 before analysis. There were no obvious outliers in these data.

166 *Species richness.* We downloaded range maps for terrestrial mammals native to North America  
167 from the IUCN Red List database (IUCN 2019). We filtered these maps to retain ranges for  
168 extant, native, resident, mainland species in ArcMap Desktop 10.3.1 (ESRI, Redlands, CA). To  
169 generate a map of species richness coincident with genetic sample sites, we estimated species  
170 richness at each site within a 10 km buffer. For the range-wide measure of species richness used  
171 in our hierarchical structural equation models, we summed the number of ranges that overlapped  
172 each of our 38 focal species' ranges. To correct for potential biases due to differences in range  
173 size (e.g. species with large ranges tending to have more overlapping ranges), we divided the  
174 number of overlapping ranges by the species' range area (km<sup>2</sup>), giving us species richness per  
175 square kilometer for each species.

176 *Environmental variables.* We used potential evapotranspiration as our measure of energy  
177 availability (Currie 1991). Specifically, potential evapotranspiration measures the atmosphere's  
178 ability to remove water from the Earth's surface and is an indicator of atmospheric energy  
179 availability. Potential evapotranspiration is one of the strongest environmental correlates of  
180 species richness in mammals (Currie 1991; Kreft and Jetz 2007; Fisher et al. 2011; Jiménez-  
181 Alfaro et al. 2016). We estimated mean potential evapotranspiration (mm/yr) across each  
182 species' range using annual potential evapotranspiration data from 1970-2000 available via the



183 CGIAR Consortium for Spatial Information (Trabucco and Zomer 2019). We used a global  
184 topography map (NOAA and U.S. National Geophysical Data Center) to record the range in  
185 elevation across focal species ranges to quantify environmental heterogeneity (Stein et al. 2015).  
186 As with species richness, we corrected elevation range for potential biases introduced by species  
187 range area, because larger ranges tended to encompass greater topographical heterogeneity.  
188 Finally, human influence was a site level variable estimated using the human population density  
189 within a 10 km zone around each site, following (Schmidt et al. 2020b) finding its strong effect  
190 on mammalian genetic diversity.

191

## 192 **Analysis**

193 *Genetic diversity and species richness maps.* All analyses were conducted in R version 3.6.1 (R  
194 Core Team 2019). Our first step was to identify spatial patterns in genetic diversity. We  
195 accomplished this using distance-based Moran's eigenvector maps (MEMs) in the R package  
196 'adespatial' (Dray et al. 2017). MEMs detect spatial patterns in data from a modified matrix of  
197 distances between sites—a neighbor matrix—whose eigenvalues are proportional to Moran's I  
198 index of spatial autocorrelation (Borcard and Legendre 2002; Borcard et al. 2004; Dray et al.  
199 2006). MEMs are spatial eigenvectors that represent relationships between sites at all spatial  
200 scales detectable by the sampling scheme and can be included in linear models because they are  
201 orthogonal. A total of 199 positive MEMs were detected. Next, we used the forward selection  
202 procedure described in (Blanchet et al. 2008) to select two sets of MEMs: one describing site-  
203 level spatial patterns in genetic diversity and the other describing site-level species richness.  
204 Thirteen MEMs explained important spatial variation in gene diversity. In order of increasingly  
205 fine spatial scales, significant patterns were MEMs 2, 3, 4, 5, 22, 27, 30, 31, 47, 49, 101, 145,

206 152. Forty-three MEMs were important predictors of species richness, and 8 of these patterns  
207 were shared by genetic diversity (significant MEMs are listed in Fig. S3).

208 We then subset MEMs based on Moran's I to retain only those explaining broad-scale spatial  
209 patterns (MEMs with Moran's I > 0.25). The cut-off for broad-scale MEMs was MEM 5 for  
210 genetic diversity and MEM 11 for species richness. We then fit individual linear regression  
211 models for species richness and genetic diversity with the broad-scale MEMs, and plotted the  
212 predicted values on a map of North America.

213

214 *Variation partitioning.* We next quantified the extent to which genetic diversity and species  
215 richness covary spatially. Because MEMs for species richness and genetic diversity were  
216 computed from the same set of coordinates, they were directly comparable. This allowed us to  
217 identify shared spatial MEMs that might be related to a common environmental cause. We used  
218 linear regressions and variance partitioning to determine what fraction of the total variation in  
219 species richness and genetic diversity could be attributed to: (1) non-spatial variation, (2) non-  
220 shared spatial variation, and (3) shared spatial variation. We partitioned variation as follows:

$$y_{SR} \sim \alpha + \beta_{1S}(\text{MEM}_{1S}) + \beta_{2S}(\text{MEM}_{2S}) + \dots + \beta_{iS}(\text{MEM}_{iS}) + \epsilon$$

$$y_{GD} \sim \alpha + \beta_{1G}(\text{MEM}_{1G}) + \beta_{2G}(\text{MEM}_{2G}) + \dots + \beta_{iG}(\text{MEM}_{iG}) + \epsilon$$

221 Where  $\alpha$  is the grand mean, and  $y_{SR}$  and  $y_{GD}$  are site-level metrics of species richness and genetic  
222 diversity.  $\text{MEM}_{iS}$  and  $\text{MEM}_{iG}$  refer to the set of MEMs explaining spatial variation in species  
223 richness and genetic diversity, respectively, and  $\beta$ s are their slopes. The coefficients of variation  
224 ( $R^2$ ) for these models gave us the total proportion of variation in each response variable

225 attributable to spatial variation. Subtracting these values from 1 gives the amount of non-spatial  
226 variation.

227 To determine the amount of shared variation, we used the set of MEMs shared between species  
228 richness and genetic diversity ( $MEM_{SG}$ ) as predictors in the regressions below:

$$y_{SR} \sim \alpha + \beta_{1SG}(MEM_{1SG}) + \beta_{2SG}(MEM_{2SG}) + \dots + \beta_{iSG}(MEM_{iSG}) + \epsilon$$

$$y_{GD} \sim \alpha + \beta_{1SG}(MEM_{1SG}) + \beta_{2SG}(MEM_{2SG}) + \dots + \beta_{iSG}(MEM_{iSG}) + \epsilon$$

229  $R^2$  values from these models yielded the proportion of variation in genetic diversity and species  
230 richness explained by shared spatial variation. Subtracting these values from the total spatial  
231 variation in species richness and genetic diversity gives the proportion of non-shared spatial  
232 variation.

233

234 *Structural equation modeling.* Next, we tested the hypothesis that differential carrying capacities  
235 and human disturbance simultaneously shape biodiversity patterns on genetic and species levels.

236 To explore the common causes of genetic and species-level diversity, we fit our conceptual  
237 model integrating population genetics and ecological limits (Fig. 3a) to data using structural  
238 equation modelling. Using this approach we can examine cause-effect relationships within  
239 hypothesis networks that accommodate multiple predictor and response variables in a  
240 hierarchical modeling framework. Multiple hypotheses can be retained in a final model.

241 Structural equation modeling is an extension of multivariate multiple regression where variables  
242 can be thought of as nodes in a network, and directional paths connecting nodes represent causal  
243 relationships. The strengths of paths are equal to regression coefficients (Shipley 2016). In  
244 addition to direct effects, you can quantify indirect effects between variables by multiplying  
245 direct effects over paths. Using standardized coefficients, we can compare the strength of

246 relationships and the relative support for retained hypotheses both within and across levels of  
247 biodiversity. The appropriateness of links in the hypothesis network can be tested using tests of  
248 directed separation (Shipley 2016), where the null hypothesis is that the two variables are  
249 independent conditional on other predictors of either variable. This means that although we start  
250 with a focus on ecological limits, the data can suggest the addition or removal of links  
251 representing alternative hypotheses.

252  
253 We have primarily focused on modeling broad-scale effects of the environment on continental  
254 patterns of species richness and genetic diversity. We therefore focus here on hierarchical  
255 modeling of patterns at the population and species level. Additionally, because the spatial  
256 coverage of genetic sample sites in the data was not evenly distributed, some species ranges  
257 could be oversampled if we considered site-level environmental variation, and thus  
258 overrepresented compared to species ranges that contain fewer sampled populations. To capture  
259 the broad spatial patterns depicted in Figure 2, and to avoid biasing our model as a result of  
260 uneven sample site locations, we considered species richness, energy availability, and  
261 heterogeneity at the species level in this analysis.

262 We implemented SEMs using the piecewiseSEM package (Lefcheck 2016; Lefcheck et al.  
263 2019). PiecewiseSEM offers greater flexibility than other SEM software because it uses a local  
264 estimation approach where each model is assessed individually (Lefcheck 2016). All variables  
265 were scaled and centered before analysis.

266 We translated our conceptual model (Fig. 3a) into a series of 3 linear models with a single model  
267 for each response variable (gene diversity, population size/body mass, and species richness). We  
268 accounted for species-level differences in gene diversity using a linear mixed-effects model

269 controlling for species as a random effect within our structural equation model network.  
270 Hierarchical models in piecewiseSEM were fit using the lme4 package (Bates et al. 2015).  
271 Conceptually, a hierarchical model is a model of models—here, we are modelling gene diversity  
272 within species and summarizing effects across species. Multiple linear regression models are fit  
273 in base R.

274 Goodness-of-fit in SEM is determined by evaluating whether there are any missing links in the  
275 causal structure, i.e. whether adding paths between pairs of variables would be more consistent  
276 with the data. In piecewiseSEM missing links are tested using tests of directed separation  
277 (Shipley 2016), where the null hypothesis is that the two variables are independent conditional  
278 on other predictors of either variable. Starting with our conceptual model (Fig. 3a), we iteratively  
279 updated models by adding links according to tests of directed separation until no further  
280 biologically sensible links were suggested. We assessed model fit using the  $p$ -value for the  
281 model network, where the null hypothesis is that the model is consistent with the data. Thus,  
282 models with  $p > 0.05$  are considered acceptable—we fail to reject our causal structure. We also  
283 assessed fit using  $R^2$  values for each response variable in the model network. For genetic  
284 diversity, we used marginal ( $R^2_m$ ) and conditional  $R^2$  ( $R^2_c$ ) values which respectively measure  
285 the total variation explained by fixed effects, and the variation explained by both fixed and  
286 random effects. We tested the residuals from component models for spatial autocorrelation using  
287 Moran’s tests and spatial correlograms.

288

289 *Effect of heterogeneity on population divergence.* After detecting a negative effect of  
290 heterogeneity on intraspecific genetic diversity in our SEM, we performed a post hoc analysis to  
291 test whether topographic heterogeneity also caused greater population differentiation within

292 species. A positive correlation between  $F_{ST}$  and heterogeneity, while controlling for distance,  
293 would suggest that individuals move less between local environments, possibly due to niche  
294 specialization. To test for differentiation we used population-specific  $F_{ST}$  (Weir and Goudet  
295 2017) as a measure of genetic divergence, which was included in the genetic diversity database  
296 (Schmidt et al. 2020a) where it was calculated in R using the ‘hierfstat’ package (Goudet and  
297 Jombart 2015). Population-specific  $F_{ST}$  can be interpreted as a relative estimate of the time since  
298 a population has diverged from a common ancestor. This metric requires at least 2 sampled  
299 populations within a study to estimate, and due to this constraint 16 sites were excluded from this  
300 analysis ( $n = 785$ ). We controlled for isolation-by-distance by including MEMs significantly  
301 related to  $F_{ST}$  to account for spatial structure. We scaled and centered all variables, then used a  
302 linear mixed model controlling for species differences by including it as a random effect.

303

## 304 **Results**

### 305 *Spatial patterns in genetic diversity and species richness*

306 We detected spatial patterns at genetic and species levels of diversity. Sixty-five percent of the  
307 total variation in species richness and 24% of variation in genetic diversity was spatially  
308 structured (Fig. S2). Variance partitioning suggested that 85% of the total spatial variation in  
309 genetic diversity, and 32% of spatial variation in species richness was accounted for by spatial  
310 patterns shared at both levels of diversity (Fig. S2). We found no obvious relationship between  
311 latitude and nuclear genetic diversity. Similar to patterns of species richness, a longitudinal  
312 gradient in genetic diversity is the dominant pattern for North American mammals—however,  
313 diversity gradients at the two levels trend in opposite directions. Nuclear genetic diversity

314 appears markedly lower in regions with high species richness, such as on the west and mid-  
315 Atlantic coasts, where there is high energy availability and topographic relief (Fig. 2).

316

317 *Joint environmental causes of genetic diversity and species richness*

318 Our conceptual model, updated according to tests of conditional independence among variables  
319 (directed separation), fit the data well (SEM  $p = 0.23$ , Fisher's  $C = 2.92$ ; Fig. 3b, Table S1). Note  
320 that for structural equation models,  $p > 0.05$  indicates that we fail to reject our model. There was  
321 no spatial autocorrelation in the body size model residuals, but genetic diversity and species  
322 richness models had statistically significant spatially autocorrelated residuals at very local scales  
323 (genetic diversity Moran's  $I = 0.025$ , species richness Moran's  $I = 0.029$ ). These Moran's  $I$   
324 values do not indicate strong spatial structure in the data, and we decided not to integrate it into  
325 our model. Positive spatial autocorrelation at such short distances is likely an artifact of irregular  
326 site locations and the hierarchical nature of the data. A lack of strong spatial autocorrelation in  
327 the model residuals suggests that the spatial structure of the diversity data was well captured by  
328 our model's environmental covariates (Fig. S3).

329

330 All predicted links in our conceptual model were supported (Fig 3a, b). Tests of directed  
331 separation suggested additional direct links from energy availability to species richness, genetic  
332 diversity to species richness, and heterogeneity to genetic diversity (Fig. 3b). Energy availability,  
333 niche heterogeneity, and human population density, acting both directly, and indirectly through  
334 species population size, explained 32% of the variation in genetic diversity. The species-level  
335 variation explained by the random effect for species brought the total variation in genetic  
336 diversity explained by our model to 75%. The same model explained 90% of the variation in

337 species richness. The strength of effects related to the more individuals hypothesis was most  
338 prominent at the genetic level of diversity. The strength of the indirect effect of energy on  
339 genetic diversity acting via population size was 0.13 compared to 0.02 for species richness (Fig.  
340 3b, Table S1). Environmental heterogeneity, however, was the strongest single predictor of  
341 species richness (path coefficient =  $0.70 \pm 0.01$  SE), and a good predictor of genetic diversity  
342 (path coefficient =  $-0.30 \pm 0.07$  SE). Directions of effects were as expected if greater niche  
343 availability reduces population sizes, leading to increased genetic drift (Fig. 3, Table S1). Gene  
344 diversity is not a measure of divergence so we tested whether environmental heterogeneity  
345 predicted evolutionary divergence at the population level. Divergence increased in  
346 heterogeneous environments ( $\beta = 0.13 \pm 0.06$  SE). Finally, human population density both  
347 directly and indirectly (via body mass/population size) affected species richness and genetic  
348 diversity (Fig. 3b). Human population density had the strongest effect on population size/body  
349 mass (path coefficient =  $-0.15 \pm 0.03$  SE), and relatively weaker direct effects on genetic  
350 diversity and species richness (Fig. 3b, Table S1).

351

## 352 **Discussion**

353 We found striking continent-wide spatial gradients in nuclear genetic diversity and show that these  
354 patterns are negatively correlated with well-described biogeographic patterns in species richness  
355 (Simpson 1964) (Fig. 2). Controlling for species-level variation, a considerable portion of the  
356 variation in both genetic diversity and species richness patterns could be explained by just three  
357 environmental factors – these were environmental energy availability, niche availability, and  
358 human disturbance. Our model was consistent with the hypothesis that environmentally set  
359 species-level carrying capacities simultaneously limit species population sizes, and consequently



360 genetic diversity through their effects on the strength of genetic drift. Niche availability was the  
361 strongest contributor to broad-scale patterns at both levels of diversity, followed by energy  
362 availability, and then human disturbance. This is strong empirical evidence suggesting that  
363 genetic diversity and species richness patterns emerge from the same processes thus jointly  
364 forming the base of the biodiversity hierarchy.

365

366 In support of the more individuals hypothesis (solid lines in Fig. 3b), our data indicated that low  
367 energy environments supported fewer species and smaller population sizes with lower genetic  
368 diversity. High energy areas had greater species richness and larger, more genetically diverse  
369 populations. However, effects related to the more individuals hypothesis were weaker than those  
370 of environmental heterogeneity (dashed lines in Fig. 3b). Heterogeneity appeared to increase  
371 species richness and facilitate coexistence through greater niche availability, however  
372 partitioning resources among niches seemed to support smaller numbers of individuals from  
373 those species, creating a negative relationship between species richness and genetic diversity. At  
374 the genetic level, greater population divergence in more heterogeneous environments suggests  
375 that genetic drift is strong and gene flow limited in these areas. Selection is more spatially  
376 varying in heterogeneous environments, and coupled with low gene flow, this could create  
377 sufficient conditions for local adaptation—which can happen even under relatively high levels of  
378 genetic drift (Hämälä et al. 2018). At lower latitudes where small-bodied species with large  
379 effective population sizes dominate, heterogeneity and spatially varying selection could be  
380 efficient drivers of ecological speciation. These results lend support to the idea that there are  
381 higher diversification rates in more complex environments because there are more opportunities  
382 for speciation. We additionally speculate that the direct effect of energy on species richness we

383 detected even after accounting for population size and heterogeneity (Fig. 3b) may be related to  
384 niche availability as well. This relationship has been noted elsewhere and has sometimes been  
385 interpreted as refuting the more individuals hypothesis (Storch et al. 2018). Vegetation structure  
386 may drive the link between species richness and temperature (Pautasso and Gaston 2005;  
387 Jiménez-Alfaro et al. 2016), as complex, vegetation-rich habitats in warmer environments also  
388 have greater niche availability. Because both links are retained in our model it seems clear that  
389 this additional link does not negate the more individuals hypothesis, but rather is additive and  
390 indeed more important in determining species richness than the more individuals effect.

391  
392 The specific ways environments shape nuclear genetic- and species-level diversity will likely  
393 differ across taxa. This carrying capacity-based interpretation of our results assumes that an  
394 environmentally set equilibrium between speciation, immigration and extinction has been  
395 reached. There is good evidence for this in North American mammals, where diversification  
396 rates have slowed as diversity increased (Brodie 2019). It seems likely that processes other than  
397 ecological limits will be more important for the diversity dynamics of taxa that may not have  
398 reached or have been knocked out of equilibrium at the genetic or species levels. Speciation is a  
399 product of both ecological and evolutionary processes, and it is unlikely ecological limits act in  
400 isolation. Indeed, the underlying causes of species richness gradients—be they ecological limits,  
401 evolutionary time, or diversification rates—have likely been debated for so long precisely  
402 because several processes operating with different importance across the timeline of  
403 diversification are capable of producing gradients (Etienne et al. 2019). Recent thinking (Pontarp  
404 and Wiens 2017) advocates a more interconnected view, suggesting that time for speciation  
405 should be most detectable more immediately following broad-scale environmental change. When

406 all locales are colonized, habitats that provide more opportunities for speciation should over time  
407 become the most diverse. As diversity increases, diversification rates slow as regions approach  
408 equilibrium (Brodie 2019). It follows that evolutionary time and diversification rates may have  
409 each at different periods of history been the dominant driver of biodiversity, but both are  
410 ultimately affected by variation in carrying capacity (Pontarp and Wiens 2017).

411  
412 Contemporary drivers of biodiversity patterns are rarely modeled in a way that makes them  
413 comparable to evolutionary scale causes. Understanding the ecological processes generating  
414 gradients in genetic diversity and species richness has important implications for understanding  
415 how biodiversity responds to human-caused environmental transformation. Cities are the world's  
416 newest and most rapidly expanding biome, and it is clear that they have already had profound  
417 effects on biodiversity patterns (Palumbi 2001; WWF 2018; Schmidt et al. 2020a). The negative  
418 effect of human population density we detected on body size is consistent with previous findings  
419 showing that urban communities tend to be made up of smaller species (Merckx et al. 2018).  
420 Although it seems human presence and heterogeneity both have negative effects on genetic  
421 diversity in our model, species richness was reduced in more urban environments (Fig. 3b). This  
422 result suggests that cities reduce population sizes and gene flow (Schmidt et al. 2020a), but  
423 currently do not support diverse communities. Because cities are relatively new habitat types and  
424 they are still in the initial phase of colonization, we would not expect them to be in equilibrium.  
425 At this stage processes related to evolutionary time will likely predominate until all available  
426 niches are occupied. Indeed, there is some evidence that following an initial extinction debt after  
427 rapid urbanization, older cities support more biodiversity (Aronson et al. 2014; Norton et al.

428 2016). Presently, a subset of species do well in cities (McKinney 2006), but the broader effects  
429 of habitat transformation remain to be seen in the long term.

430  
431 It is notable that the negative correlation we find between species richness and nuclear genetic  
432 diversity contradicts relatively consistent positive correlations found between species richness  
433 and mitochondrial (mtDNA) genetic diversity (Miraldo et al. 2016; Manel et al. 2020; Millette et  
434 al. 2020; Theodoridis et al. 2020). This contrast warrants deeper exploration because it has  
435 implications for how we interpret biogeographical patterns in genetic diversity to advance  
436 general evolutionary knowledge, and how we apply this knowledge for the purposes of  
437 conservation and management. mtDNA has several idiosyncrasies associated with the specific  
438 biology of mitochondria that distinguish it from genetic diversity measured with neutral nuclear  
439 DNA. It is inherited as a single non-recombining locus, and has highly variable mutation rates  
440 which can vary 100-fold across species (Nabholz et al. 2008). Cellular metabolism within  
441 mitochondria produces reactive oxygen species which affect mutation rates in mtDNA, but these  
442 oxygen radicals do not cause oxidative damage in the nucleus (Hoffmann et al. 2004; Lanfear et  
443 al. 2007)—further decoupling mtDNA and nuclear DNA diversity. The most commonly used  
444 markers in mtDNA studies are the protein-coding genes *cytochrome oxidase I* and *cytochrome b*,  
445 which are involved in cellular respiration and very likely do not evolve under neutrality (Galtier  
446 et al. 2009). Unlike neutral nuclear DNA, it has been shown that mtDNA diversity is unrelated to  
447 life history, ecological traits, and census and effective population sizes (Bazin et al. 2006;  
448 Nabholz et al. 2008). mtDNA diversity is thus a very different quantity than the neutral nuclear  
449 diversity estimates we use here. Its lack of relationship with population size makes it unsuited for  
450 testing demographic hypotheses related to ecological limits or environmental stability, where

451 instability causes population size fluctuations which limit species richness. Using genetic  
452 diversity metrics estimated from neutral nuclear DNA allows us to more clearly link  
453 environments to species richness and genetic diversity through demography, population size, and  
454 by extension, species life history traits which partly set the effective population size.

455  
456 Given the above-described concerns about the suitability of mtDNA for detecting patterns of  
457 interest, what then could drive the positive correlation between species richness and mtDNA  
458 diversity? Such a relationship could be due to an analytical issue. Studies of mtDNA diversity –  
459 species richness correlations tend to aggregate sequences within pre-defined geographic  
460 sampling units, calculate mtDNA diversity for each species, then use the average diversity of all  
461 species sampled in a spatial unit as their measure of genetic diversity in subsequent analyses  
462 (Miraldo et al. 2016; Manel et al. 2020; Theodoridis et al. 2020). We suspect that this metric of  
463 variation captures phylogenetic signals in mtDNA, and thus that it must be positively correlated  
464 with species diversity because it reflects the accumulation of mutations following reproductive  
465 divergence. Given the peculiarities of mtDNA noted above, we are concerned that conservation  
466 recommendations for maintaining genetic diversity based on positive correlations between  
467 mtDNA diversity and species diversity are misplaced (Miraldo et al. 2016; Theodoridis et al.  
468 2020). Studies of mtDNA diversity – species richness correlations often interpret regions with  
469 high mtDNA variation as indicative of a population’s capacity to adapt, and thus warranting  
470 conservation concern (Theodoridis et al. 2020). Regardless of whether one accepts the concerns  
471 we describe, this too seems inappropriate. A population’s capacity to adapt is defined as the  
472 additive genetic variance underlying fitness (Fisher 1930). Though theory, based on strong  
473 assumptions, suggests that neutral nuclear genetic diversity should predict additive genetic

474 variation (Falconer and Mackay 1996), it appears that this relationship is not strong enough to be  
475 useful in practice (Mittell et al. 2015). There is no expectation of correlations between mtDNA  
476 diversity and either neutral nuclear genetic diversity, or additive genetic variation (Mittell et al.  
477 2015). mtDNA diversity thus cannot be interpreted as a population's capacity to adapt. Neutral  
478 microsatellite variation does indeed reflect genome-wide variation well (Mittell et al. 2015).  
479 Though not strongly correlated with the capacity to adapt, genome-wide variation is indicative of  
480 the efficiency of selection through its link to effective population size and the scope for  
481 inbreeding. Given that we have no reason to suspect that mtDNA reflects adaptive potential and  
482 that mtDNA diversity trends opposite of nuclear genetic diversity, general management  
483 strategies aimed at conserving high mtDNA genetic diversity regions would seem to have the  
484 opposite effect of the conservation intent.

485  
486 Ecosystem sustainability given environmental perturbations occurring more frequently due to  
487 human causes, depends on the resiliency of landscapes, communities, and populations (Oliver et  
488 al. 2015). Genetic diversity is crucial to a population's adaptive potential because the efficiency  
489 with which selection can act is determined by the effective population size which sets the rate of  
490 genetic drift. Yet genetic diversity is not equally distributed in space and indeed, in mammals,  
491 appears to be lower in heterogeneous environments which exert greater spatially varying  
492 selection. Knowledge of how natural environments shape population genetic composition is  
493 fundamental to understanding how these natural patterns will shift with continued land  
494 transformation by humans. Mammals are one of the best-studied taxa, however, rules applicable  
495 to them may not generalize well across other groups. For instance, the relevance of the more  
496 individuals hypothesis for ectotherms has been questioned because their energy usage is well

497 below that of endotherms (Buckley et al. 2008). Indeed, continental patterns of species richness  
498 differ across taxa, which may stem from life history or physiology differences (Currie 1991). It  
499 will be necessary to test the hypothesis developed here on other taxonomic groups and in  
500 different regions to gain a more holistic understanding of the causes of biodiversity. The intimate  
501 connections between the environment, species richness, and genetic diversity we find here  
502 suggest that changes on one level can cascade throughout the system and profoundly reshape  
503 biodiversity patterns across multiple biological levels in ways we do not yet fully grasp.

504  
505 **Author contributions:** C.J.G. and C.S. conceptualized the study. C.S., S.D. and C.J.G. designed  
506 the study and C.S. conducted the statistical analysis with input from S.D. and C.J.G. All authors  
507 contributed to data interpretation. C.S. wrote the first draft of the manuscript and all authors  
508 participated in editing subsequent manuscript drafts.

509  
510 **Acknowledgements:** We would like to thank the Population Ecology and Evolutionary Genetics  
511 group for their feedback on this manuscript. We are also grateful to the authors whose work  
512 provided the raw data for this synthesis. C.S. and C.J.G. were supported by a Natural Sciences  
513 and Engineering Research Council of Canada Discovery Grant to C.J.G. C.S. was also supported  
514 by a U. Manitoba Graduate Fellowship, and a U. Manitoba Graduate Enhancement of Tri-council  
515 funding grant to C.J.G.

516  
517 **Data availability:** Synthesized genetic data is available from the Dryad Data Repository (DOI:  
518 10.5061/dryad.cz8w9gj0c). Species range boundary files and environmental data are available  
519 from open online sources (see Methods).

## 520 **References**

- 521 Allouche, O., M. Kalyuzhny, G. Moreno-Rueda, M. Pizarro, and R. Kadmon. 2012. Area-  
522 heterogeneity tradeoff and the diversity of ecological communities. *Proc. Natl. Acad. Sci.*  
523 *U. S. A.* 109:17495–17500.
- 524 Aronson, M. F. J., F. A. La Sorte, C. H. Nilon, M. Katti, M. A. Goddard, C. A. Lepczyk, P. S.  
525 Warren, N. S. G. Williams, S. Cilliers, B. Clarkson, C. Dobbs, R. Dolan, M. Hedblom, S.  
526 Klotz, J. L. Kooijmans, I. Kühn, I. MacGregor-Fors, M. McDonnell, U. Mörtberg, P. Pyšek,  
527 S. Siebert, J. Sushinsky, P. Werner, and M. Winter. 2014. A global analysis of the impacts  
528 of urbanization on bird and plant diversity reveals key anthropogenic drivers. *Proc. R. Soc.*  
529 *B Biol. Sci.* 281:20133330.
- 530 Bates, D., M. Mächler, B. Bolker, and S. Walker. 2015. Fitting linear mixed-effects models using  
531 *lme4*. *J. Stat. Softw.* 67.
- 532 Bazin, E., S. Glémin, and N. Galtier. 2006. Population size does not influence mitochondrial  
533 genetic diversity in animals. *Science.* 312:570–572.
- 534 Blanchet, G. F., P. Legendre, and Borcard. 2008. Forward selection of explanatory variables.  
535 *Ecology* 89:2623–2632.
- 536 Borcard, D., and P. Legendre. 2002. All-scale spatial analysis of ecological data by means of  
537 principal coordinates of neighbour matrices. *Ecol. Modell.* 153:51–68.
- 538 Borcard, D., P. Legendre, C. Avois-Jacquet, and H. Tuomisto. 2004. Dissecting the spatial  
539 structure of ecological data at multiple scales. *Ecology* 85:1826–1832.
- 540 Brodie, J. F. 2019. Environmental limits to mammal diversity vary with latitude and global  
541 temperature. *Ecol. Lett.* 22:480–485.
- 542 Buckley, L. B., G. H. Rodda, and W. Jetz. 2008. Thermal and energetic constraints on ectotherm  
543 abundance: A global test using lizards. *Ecology* 89:48–55.
- 544 Ceballos, G., P. R. Ehrlich, and P. H. Raven. 2020. Vertebrates on the brink as indicators of  
545 biological annihilation and the sixth mass extinction. *Proc. Natl. Acad. Sci. U. S. A.*  
546 117:13596–13602.
- 547 Charlesworth, B., and D. Charlesworth. 2010. *Elements of evolutionary genetics*. Roberts &  
548 Company Publishers, Greenwood Village, Colorado, USA.
- 549 Currie, D. J. 1991. Energy and large-scale patterns of animal- and plant-species richness. *Am.*  
550 *Nat.* 137:27–49.
- 551 Damuth, J. 1987. Interspecific allometry of population density in mammals and other animals:  
552 the independence of body mass and population energy-use. *Biol. J. Linn. Soc.* 31:193–246.
- 553 Damuth, J. 1981. Population density and body size in mammals. *Nature* 290:1980–1981.
- 554 Dray, S., G. Blanchet, D. Borcard, S. Clappe, G. Guenard, T. Jombart, G. Larocque, P. Legendre,  
555 N. Madi, and H. H. Wagner. 2017. *adespatial: Multivariate Multiscale Spatial Analysis*.



- 556 Dray, S., P. Legendre, and P. R. Peres-Neto. 2006. Spatial modelling: a comprehensive  
557 framework for principal coordinate analysis of neighbour matrices (PCNM). *Ecol. Modell.*  
558 196:483–493.
- 559 Etienne, R. S., J. S. Cabral, O. Hagen, F. Hartig, A. H. Hurlbert, L. Pellissier, M. Pontarp, and D.  
560 Storch. 2019. A minimal model for the latitudinal diversity gradient suggests a dominant  
561 role for ecological limits. *Am. Nat.* 194:E122–E133.
- 562 Falconer, D. S., and T. F. C. Mackay. 1996. *Introduction to Quantitative Genetics*. 4th ed.  
563 Longman, Harlow, Essex, UK.
- 564 Fisher, J. B., R. J. Whittaker, and Y. Malhi. 2011. ET come home: Potential evapotranspiration  
565 in geographical ecology. *Glob. Ecol. Biogeogr.* 20:1–18.
- 566 Fisher, R. A. 1930. *The Genetical Theory of Natural Selection*. Oxford University Press, Oxford.
- 567 Frankham, R. 1996. Relationship of Genetic variation to population size in wildlife. *Conserv.*  
568 *Biol.* 10:1500–1508.
- 569 Galtier, N., B. Nabholz, S. Glémin, and G. D. D. Hurst. 2009. Mitochondrial DNA as a marker  
570 of molecular diversity: A reappraisal. *Mol. Ecol.* 18:4541–4550.
- 571 Goudet, J., and T. Jombart. 2015. *hierfstat: Estimation and Tests of Hierarchical F-Statistics*.
- 572 Grimm, N. B., S. H. Faeth, N. E. Golubiewski, C. L. Redman, J. Wu, X. Bai, and J. M. Briggs.  
573 2008. Global Change and the Ecology of Cities. *Science.* 319:756–760.
- 574 Hämälä, T., T. M. Mattila, and O. Savolainen. 2018. Local adaptation and ecological  
575 differentiation under selection, migration and drift in *Arabidopsis lyrata*. *Evolution.*  
576 72:1373–1386.
- 577 Hoffmann, S., D. Spitkovsky, J. P. Radicella, B. Epe, and R. J. Wiesner. 2004. Reactive oxygen  
578 species derived from the mitochondrial respiratory chain are not responsible for the basal  
579 levels of oxidative base modifications observed in nuclear DNA of mammalian cells. *Free*  
580 *Radic. Biol. Med.* 36:765–773.
- 581 Hubbell, S. P. 2001. *The Unified Neutral Theory of Biodiversity and Biogeography*. Princeton  
582 University Press, Princeton NJ.
- 583 IUCN. 2019. *The IUCN Red List of Threatened Species*. Version 2019-1.
- 584 Jiménez-Alfaro, B., M. Chytrý, L. Mucina, J. B. Grace, and M. Rejmánek. 2016. Disentangling  
585 vegetation diversity from climate-energy and habitat heterogeneity for explaining animal  
586 geographic patterns. *Ecol. Evol.* 6:1515–1526.
- 587 Jones, K. E., J. Bielby, M. Cardillo, S. A. Fritz, J. O’Dell, C. D. L. Orme, K. Safi, W. Sechrest,  
588 E. H. Boakes, C. Carbone, C. Connolly, M. J. Cutts, J. K. Foster, R. Grenyer, M. Habib, C.  
589 A. Plaster, S. A. Price, E. A. Rigby, J. Rist, A. Teacher, O. R. P. Bininda-Emonds, J. L.  
590 Gittleman, G. M. Mace, and A. Purvis. 2009. PanTHERIA: a species-level database of life  
591 history, ecology, and geography of extant and recently extinct mammals. *Ecology* 90:2648–  
592 2648.
- 593 Jones, M. B., P. Slaughter, R. Nahf, C. Boettiger, C. Jones, J. Read, L. Walker, E. Hart, and S.

- 594 Chamberlain. 2017. dataone: R Interface to the DataONE REST API.
- 595 Kadmon, R., and O. Allouche. 2007. Integrating the effects of area, isolation, and habitat  
596 heterogeneity on species diversity: A unification of island biogeography and niche theory.  
597 *Am. Nat.* 170:443–454.
- 598 Kimura, M. 1983. *The Neutral Theory of Molecular Evolution*. Cambridge University Press,  
599 Cambridge.
- 600 Kreft, H., and W. Jetz. 2007. Global patterns and determinants of vascular plant diversity. *Proc.*  
601 *Natl. Acad. Sci.* 104:5925–5930.
- 602 Lanfear, R., J. A. Thomas, J. J. Welch, T. Brey, and L. Bromham. 2007. Metabolic rate does not  
603 calibrate the molecular clock. *Proc. Natl. Acad. Sci. U. S. A.* 104:15388–15393.
- 604 Lefcheck, J., J. Byrnes, and J. Grace. 2019. piecewiseSEM: Piecewise Structural Equation  
605 Modeling.
- 606 Lefcheck, J. S. 2016. piecewiseSEM: Piecewise structural equation modelling in r for ecology,  
607 evolution, and systematics. *Methods Ecol. Evol.* 7:573–579.
- 608 Leigh, D. M., A. P. Hendry, E. Vázquez-Domínguez, and V. L. Friesen. 2019. Estimated six per  
609 cent loss of genetic variation in wild populations since the industrial revolution. *Evol. Appl.*  
610 12:1505–1512.
- 611 Lomolino, M., B. Riddle, and R. Whittaker. 2016. *Biogeography: biological diversity across*  
612 *space and time*. 5th ed. Oxford University Press.
- 613 Lowe, W. H., R. P. Kovach, and F. W. Allendorf. 2017. Population genetics and demography  
614 unite ecology and evolution. *Trends Ecol. Evol.* 32:141–152. Elsevier Ltd.
- 615 Manel, S., P. E. Guerin, D. Mouillot, S. Blanchet, L. Velez, C. Albouy, and L. Pellissier. 2020.  
616 Global determinants of freshwater and marine fish genetic diversity. *Nat. Commun.* 11:1–9.  
617 Springer US.
- 618 McKinney, M. L. 2006. Urbanization as a major cause of biotic homogenization. *Biol. Conserv.*  
619 127:247–260.
- 620 Merckx, T., C. Souffreau, A. Kaiser, L. F. Baardsen, T. Backeljau, D. Bonte, K. I. Brans, M.  
621 Cours, M. Dahirel, N. Debortoli, K. De Wolf, J. M. T. Engelen, D. Fontaneto, A. T.  
622 Gianuca, L. Govaert, F. Hendrickx, J. Higuera, L. Lens, K. Martens, H. Matheve, E.  
623 Matthysen, E. Piano, R. Sablon, I. Schön, K. Van Doninck, L. De Meester, and H. Van  
624 Dyck. 2018. Body-size shifts in aquatic and terrestrial urban communities. *Nature* 558:113–  
625 116.
- 626 Millette, K. L., V. Fugère, C. Debyser, A. Greiner, F. J. J. Chain, and A. Gonzalez. 2020. No  
627 consistent effects of humans on animal genetic diversity worldwide. *Ecol. Lett.* 23:55–67.
- 628 Miraldo, A., S. Li, M. K. Borregaard, A. Florez-Rodriguez, S. Gopalakrishnan, M. Rizvanovic,  
629 Z. Wang, C. Rahbek, K. A. Marske, and D. Nogues-Bravo. 2016. An Anthropocene map of  
630 genetic diversity. *Science*. 353:1532–1535.
- 631 Mittelbach, G. G., D. W. Schemske, H. V. Cornell, A. P. Allen, J. M. Brown, M. B. Bush, S. P.

- 632 Harrison, A. H. Hurlbert, N. Knowlton, H. A. Lessios, C. M. McCain, A. R. McCune, L. A.  
633 McDade, M. A. McPeck, T. J. Near, T. D. Price, R. E. Ricklefs, K. Roy, D. F. Sax, D.  
634 Schluter, J. M. Sobel, and M. Turelli. 2007. Evolution and the latitudinal diversity gradient:  
635 Speciation, extinction and biogeography. *Ecol. Lett.* 10:315–331.
- 636 Mittell, E. A., S. Nakagawa, and J. D. Hadfield. 2015. Are molecular markers useful predictors  
637 of adaptive potential? *Ecol. Lett.* 18:772–778.
- 638 Nabholz, B., J. F. Mauffrey, E. Bazin, N. Galtier, and S. Glemin. 2008. Determination of  
639 mitochondrial genetic diversity in mammals. *Genetics* 178:351–361.
- 640 Nei, M. 1973. Analysis of gene diversity in subdivided populations. *Proc. Natl. Acad. Sci. U. S.*  
641 *A.* 70:3321–3323.
- 642 NOAA, and U.S. National Geophysical Data Center. n.d. TerrainBase, release 1.0. Boulder CO.
- 643 Norton, B. A., K. L. Evans, and P. H. Warren. 2016. Urban biodiversity and landscape ecology:  
644 patterns, processes and planning. *Curr. Landsc. Ecol. Reports* 1:178–192. *Current*  
645 *Landscape Ecology Reports*.
- 646 Oliver, T. H., M. S. Heard, N. J. B. Isaac, D. B. Roy, D. Procter, F. Eigenbrod, R. Freckleton, A.  
647 Hector, C. D. L. Orme, O. L. Petchey, V. Proença, D. Raffaelli, K. B. Suttle, G. M. Mace,  
648 B. Martín-López, B. A. Woodcock, and J. M. Bullock. 2015. Biodiversity and resilience of  
649 ecosystem functions. *Trends Ecol. Evol.* 30:673–684. Elsevier Ltd.
- 650 Palumbi, S. R. 2001. Humans as the world’s greatest evolutionary force. *Science.* 293:1786–  
651 1790.
- 652 Pautasso, M., and K. J. Gaston. 2005. Resources and global avian assemblage structure in  
653 forests. *Ecol. Lett.* 8:282–289.
- 654 Pontarp, M., L. Bunnefeld, J. S. Cabral, R. S. Etienne, S. A. Fritz, R. Gillespie, C. H. Graham, O.  
655 Hagen, F. Hartig, S. Huang, R. Jansson, O. Maliet, T. Münkemüller, L. Pellissier, T. F.  
656 Rangel, D. Storch, T. Wiegand, and A. H. Hurlbert. 2019. The latitudinal diversity gradient:  
657 novel understanding through mechanistic eco-evolutionary models. *Trends Ecol. Evol.*  
658 34:211–223.
- 659 Pontarp, M., and J. J. Wiens. 2017. The origin of species richness patterns along environmental  
660 gradients: uniting explanations based on time, diversification rate and carrying capacity. *J.*  
661 *Biogeogr.* 44:722–735.
- 662 R Core Team. 2019. R: A Language and Environment for Statistical Computing. Vienna,  
663 Austria.
- 664 Romiguier, J., P. Gayral, M. Ballenghien, A. Bernard, V. Cahais, A. Chenuil, Y. Chiari, R.  
665 Dernet, L. Duret, N. Faivre, E. Loire, J. M. Lourenco, B. Nabholz, C. Roux, G.  
666 Tsagkogeorga, A. A. T. Weber, L. A. Weinert, K. Belkhir, N. Bierne, S. Gliç½min, and N.  
667 Galtier. 2014. Comparative population genomics in animals uncovers the determinants of  
668 genetic diversity. *Nature* 515:261–263.
- 669 Schmidt, C., M. Domaratzki, R. P. Kinnunen, J. Bowman, and C. J. Garroway. 2020a. Continent-  
670 wide effects of urbanization on bird and mammal genetic diversity. *Proc. R. Soc. B Biol.*

- 671           Sci. 287:20192497.
- 672 Schmidt, C., M. Domaratzki, R. P. Kinnunen, J. Bowman, and C. J. Garroway. 2020b. Data  
673           from: Continent-wide effects of urbanization on bird and mammal genetic diversity. Dryad  
674           Data Repository.
- 675 Shipley, B. 2016. Cause and correlation in biology. 2nd ed. Cambridge University Press,  
676           Cambridge.
- 677 Simpson, G. G. 1964. Species density of North American recent mammals. *Syst. Zool.* 13:57–73.
- 678 Stein, A., J. Beck, C. Meyer, E. Waldmann, P. Weigelt, and H. Kreft. 2015. Differential effects  
679           of environmental heterogeneity on global mammal species richness. *Glob. Ecol. Biogeogr.*  
680           24:1072–1083.
- 681 Stein, A., K. Gerstner, and H. Kreft. 2014. Environmental heterogeneity as a universal driver of  
682           species richness across taxa, biomes and spatial scales. *Ecol. Lett.* 17:866–880.
- 683 Storch, D., E. Bohdalková, and J. Okie. 2018. The more-individuals hypothesis revisited: the role  
684           of community abundance in species richness regulation and the productivity–diversity  
685           relationship. *Ecol. Lett.* 21:920–937.
- 686 Storch, D., and J. G. Okie. 2019. The carrying capacity for species richness. *Glob. Ecol.*  
687           *Biogeogr.* 28:1519–1532.
- 688 Theodoridis, S., D. A. Fordham, D. Nogues-Bravo, and S. C. Brown. 2020. Evolutionary history  
689           and past climate change shape the distribution of genetic diversity in terrestrial mammals.  
690           *Nat. Commun.* 1–11.
- 691 Trabucco, A., and R. Zomer. 2019. Global Aridity Index and Potential Evapotranspiration (ET0)  
692           Climate Database v2. , doi: 10.6084/m9.figshare.7504448.v3.
- 693 Vellend, M. 2005. Species diversity and genetic diversity: parallel processes and correlated  
694           patterns. *Am. Nat.* 166:199–215.
- 695 Weir, B. S., and J. Goudet. 2017. A Unified Characterization of Population Structure. *Genetics*  
696           206:2085–2103.
- 697 Worm, B., and D. P. Tittensor. 2018. A theory of global biodiversity. Princeton University Press,  
698           Princeton, New Jersey.
- 699 WWF. 2018. Living Planet Report - 2018: Aiming higher. WWF, Gland, Switzerland.
- 700

## Carrying capacity

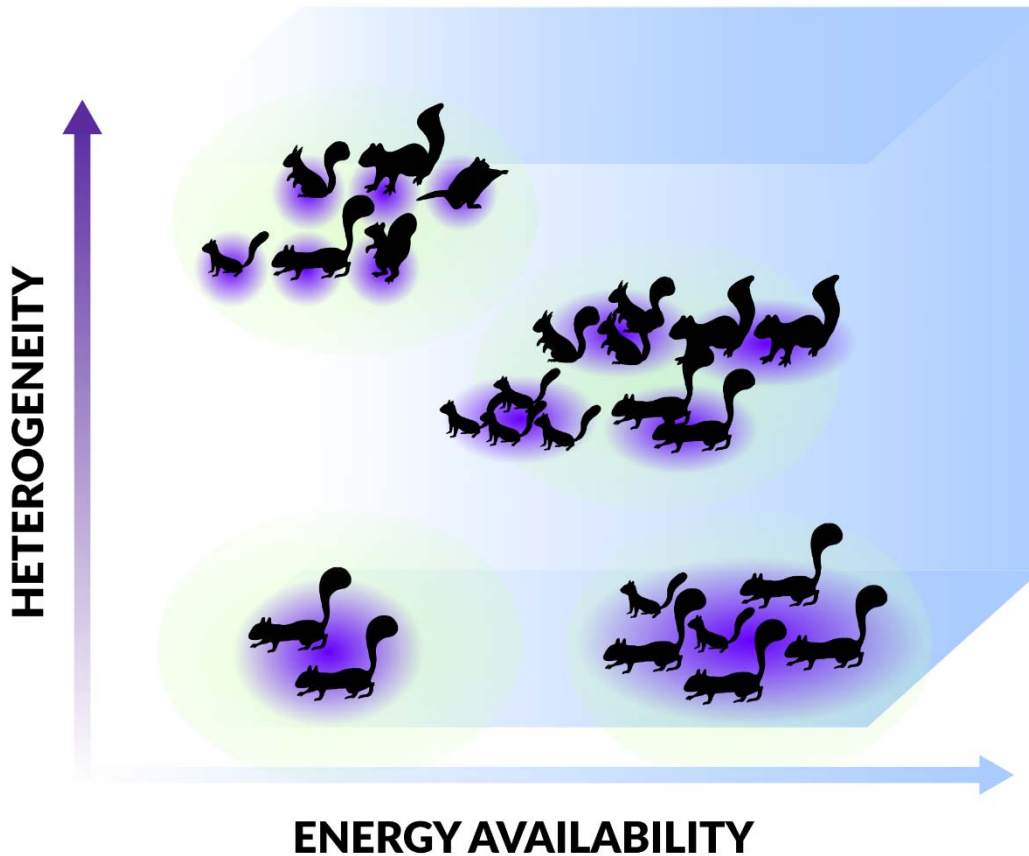

701 **Fig. 1.** Carrying capacities at population and species levels. Green areas represent total habitat  
702 area, and are all equal in size. Purple areas are niches, which increase in number with increasing  
703 heterogeneity (y axis), and increase in area with higher energy availability (x axis). In general, as  
704 energy availability increases, individual carrying capacities are higher, resulting in greater  
705 diversity at species and genetic levels (the more individuals hypothesis). As heterogeneity  
706 increases, species richness is higher due to the increased availability of niches. However,  
707 population sizes are reduced because niche area is smaller in more heterogeneous areas,  
708 generating a negative relationship between species richness and genetic diversity (heterogeneity  
709 hypothesis).

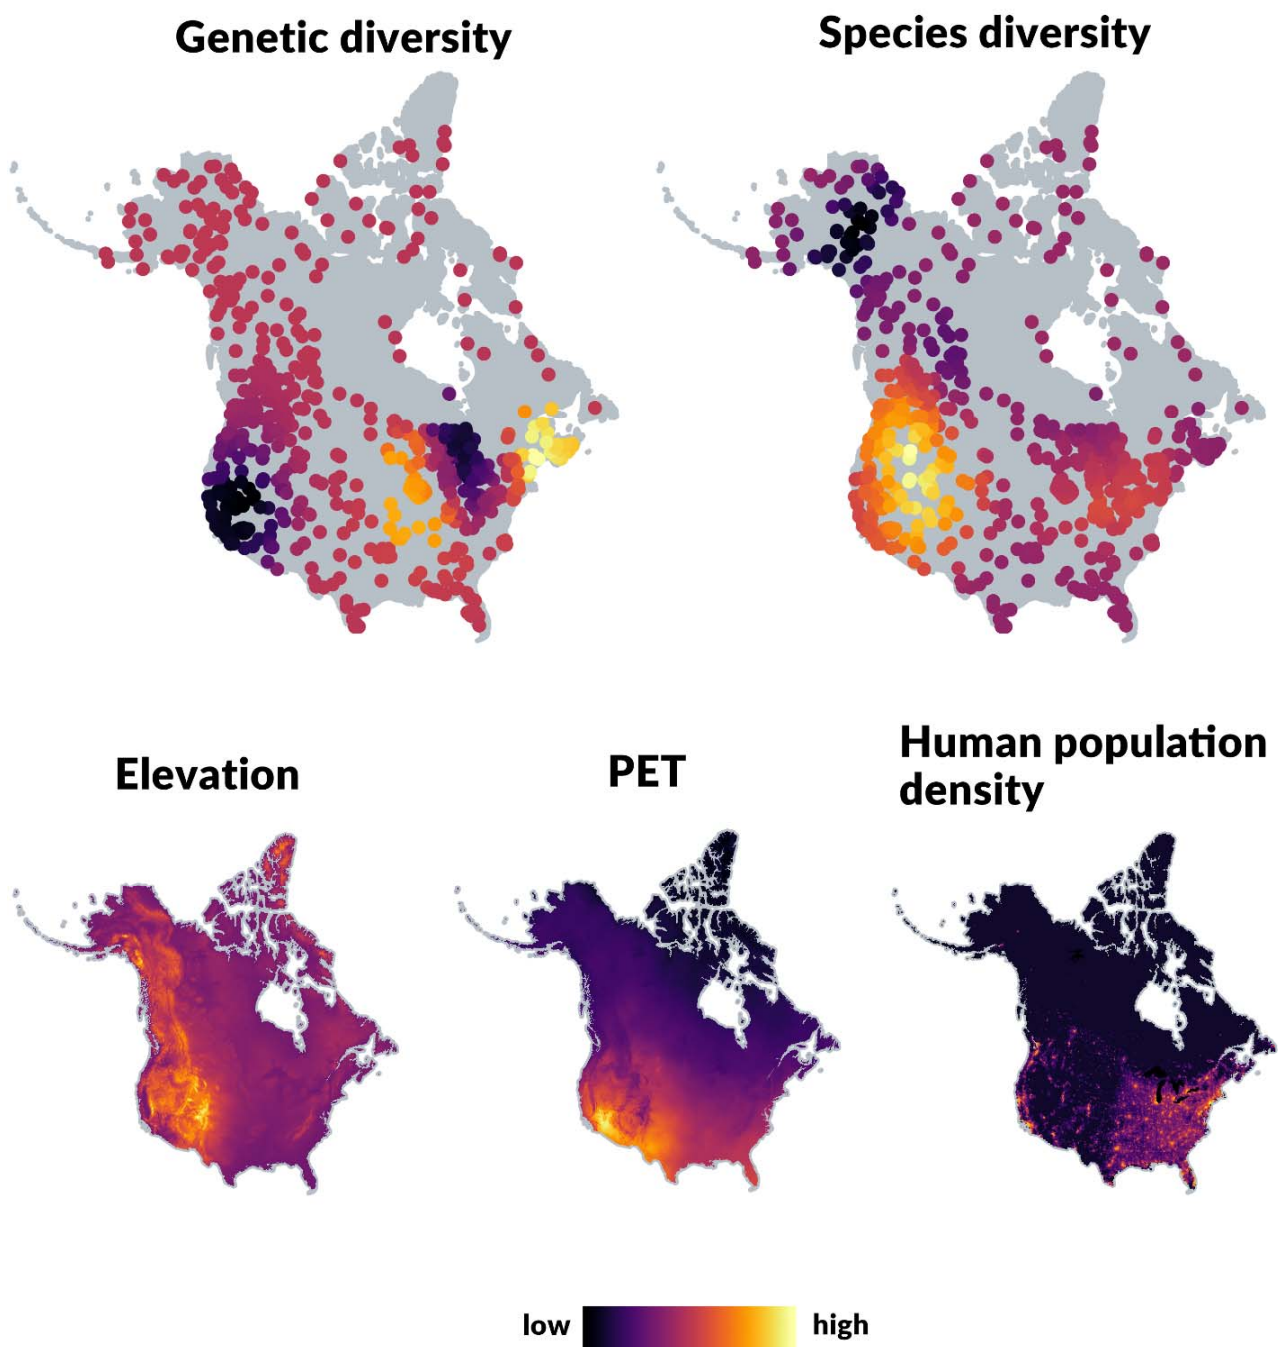

710

711 **Fig. 2.** Maps depicting spatial patterns of biodiversity and environmental factors. (*Top row*)  
712 Points are the locations of 801 North American mammal populations for which raw  
713 microsatellite data was available in public repositories. Point color indicates predicted values of  
714 genetic diversity and species richness based on spatial patterns detected in the data. (*Bottom row*)  
715 Maps showing the three environmental variables which we tested for simultaneous effects on  
716 genetic diversity and species richness.

A

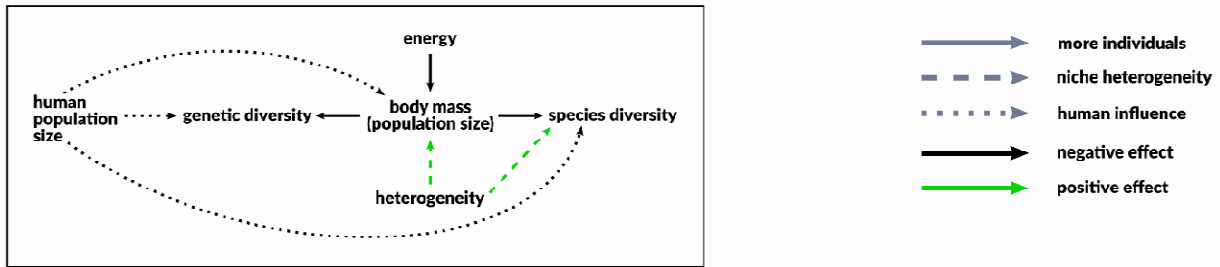

B

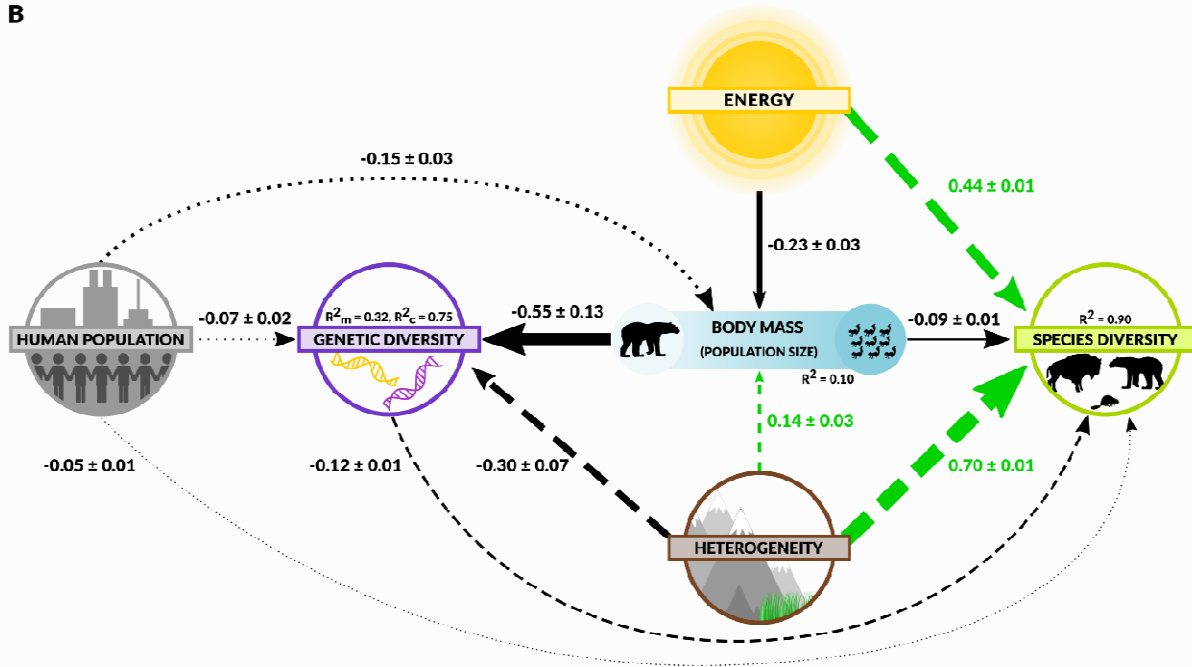

717

718 **Fig. 3.** Structural equation models. (a) Our conceptual hypothesis network combining the more  
 719 individuals hypothesis (solid lines) with the effects of environmental heterogeneity (dashed  
 720 lines) and human presence (dotted lines). Arrows represent unidirectional relationships between  
 721 variables. (b) Structural equation model results. Green and black lines positive and negative  
 722 relationships, respectively. Line widths reflect coefficient estimates, which are listed above each  
 723 path with standard errors.  $R^2$  values are the amount of variation explained for each response  
 724 variable. Mass and species richness were measured at the species level, and genetic diversity was  
 725 measured at the population level and fit with a random effect for species:  $R^2_m$  is the variation  
 726 explained by fixed effects only, and  $R^2_c$  is the variation explained by fixed and random effects.
